# Supplementary material for: Quercetin increased bioavailability and decreased methylation of green tea polyphenols in vitro and in vivo
Source: Royal Society of Chemistry journal article supplement (doi:10.1039/c2fo10254d), 2012-01-01
Supplement: c2fo10254d.pdf [file c2fo10254d.pdf]

## Supplementary information

A

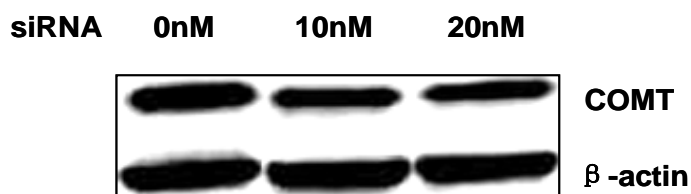

B

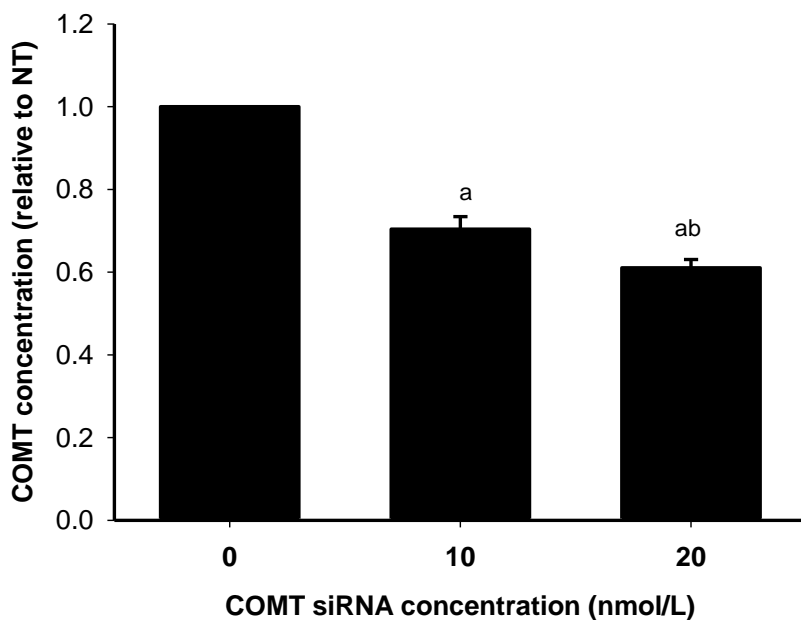

**Figure S1.** Inhibition of COMT gene expression by siRNA in HepG2 cells. HepG2 cells were treated with 0, 10, or 20nM of COMT siRNA following the manufacturer's protocol. COMT protein levels were analyzed using Western blot. Protein was imaged (A) and quantitated (B) using a chemiluminescence detection and imaging system. Values are expressed as mean  $\pm$  SD. The superscript letters represent significant difference between groups ( $P < 0.05$ ): <sup>a</sup> compared to no siRNA treatment; <sup>b</sup> compared to 10nM siRNA treatment.

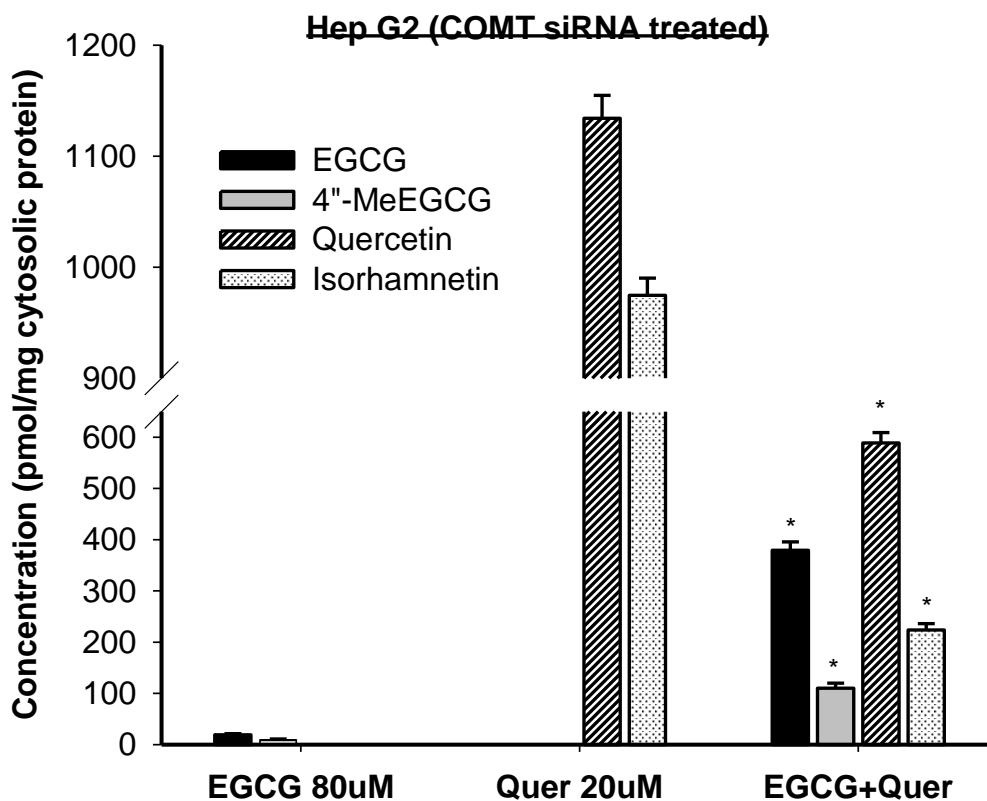

**Figure S2.** Cellular uptake and metabolism of EGCG and quercetin in HepG2 cells treated with COMT siRNA. HepG2 cells were pre-treated with 10nM of COMT siRNA followed by treatment with the indicated concentrations of EGCG and quercetin alone or in combination. Cellular concentrations were detected 2h after treatment. Values are expressed as mean  $\pm$  SD. \* compared to individual treatments,  $P < 0.05$ .
